# Supplementary material
Source: MDPI journal article supplement (https://www.mdpi.com/2073-431X/12/2/39)
Supplement: s1 [file s1]

Archive with 1 entries (1 files):
- computers-2068083-supplementary.pdf
